## SHORT REPORT

# PDGFR $\beta$ and oncogenic mutant PDGFR $\alpha$ D842V promote disassembly of primary cilia through a PLC $\gamma$ - and AURKA-dependent mechanism

Brian S. Nielsen\*, Raj R. Malinda\*, Fabian M. Schmid, Stine F. Pedersen, Søren T. Christensen and Lotte B. Pedersen<sup>†</sup>

**ABSTRACT**

Primary cilia are microtubule-based sensory organelles projecting from most quiescent mammalian cells, which disassemble in cells cultured in serum-deprived conditions upon re-addition of serum or growth factors. Platelet-derived growth factors (PDGF) are implicated in deciliation, but the specific receptor isoforms and mechanisms involved are unclear. We report that PDGFR $\beta$  promotes deciliation in cultured cells and provide evidence implicating PLC $\gamma$  and intracellular Ca<sup>2+</sup> release in this process. Activation of wild-type PDGFR $\alpha$  alone did not elicit deciliation. However, expression of constitutively active PDGFR $\alpha$  D842V mutant receptor, which potently activates PLC $\gamma$  (also known as PLCG1), caused significant deciliation, and this phenotype was rescued by inhibiting PDGFR $\alpha$  D842V kinase activity or AURKA. We propose that PDGFR $\beta$  and PDGFR $\alpha$  D842V promote deciliation through PLC $\gamma$ -mediated Ca<sup>2+</sup> release from intracellular stores, causing activation of calmodulin and AURKA-triggered deciliation.

**KEY WORDS:** Aurora A kinase, PLC $\gamma$ , Platelet-derived growth factor receptor, Deciliation, Gastrointestinal stromal tumor, Primary cilia

**INTRODUCTION**

Primary cilia comprise a microtubule axoneme enclosed by a bilayer lipid membrane enriched for specific receptors, such as receptor tyrosine kinases (RTKs) PDGFR $\alpha$  (Schneider et al., 2005) and IGF-1R (Zhu et al., 2009). The axoneme arises from the centrosomal mother centriole, which transforms into a basal body during the G1 or G0 phase of the cell cycle (Kobayashi and Dynlacht, 2011). Upon cell cycle re-entrance, the cilium disassembles, allowing centrioles to duplicate to form mitotic spindle poles (Quarmany and Parker, 2005).

Emerging evidence has linked defective ciliary disassembly to cancer, and several deciliation factors are known cell cycle regulators that are implicated in tumor growth (Pan et al., 2013; Seeger-Nukpezah et al., 2013). Central amongst these is AURKA, which is activated by most other known deciliation factors (Pan et al., 2013; Seeger-Nukpezah et al., 2013). AURKA has been implicated in deciliation in *Chlamydomonas* (Pan et al., 2004) and retinal pigment epithelial (RPE)1 cells, where AURKA has been shown to be activated by HEF1 to promote activation of HDAC6,

causing deacetylation and destabilization of axonemal microtubules (Pugacheva et al., 2007), although the importance of HDAC6 for deciliation has been questioned (Goto et al., 2013). Subsequent reports have confirmed the role of AURKA in deciliation and identified additional factors that regulate its activity, including calmodulin (CaM) (Plotnikova et al., 2012), PLK1 (Lee et al., 2012), Pitchfork (Kinzel et al., 2010), Trichoplein (Inoko et al., 2012) and Peroxiredoxin 1 (Gong et al., 2014).

In serum-deprived, ciliated RPE1 and NIH3T3 cells, deciliation occurs in two waves – at the G0–G1 transition within 2 h of re-adding serum or growth factors, and at the G1–S transition (approximately 18 h post serum), which is serum- and/or growth-factor-independent (Pugacheva et al., 2007; Spalluto et al., 2013; Tucker et al., 1979). Serum-induced deciliation has been suggested to involve PDGF signaling (Pugacheva et al., 2007; Tucker et al., 1979), and one study indicates that PDGF-AA, which specifically activates homodimeric PDGFR $\alpha$  (Andrae et al., 2008), induces partial deciliation in RPE1 cells (Yeh et al., 2013), presumably because additional growth factors like IGF-1 are also required (Bielas et al., 2009; Yeh et al., 2013). The mechanism by which PDGF promotes deciliation is unclear, although PI3K has been implicated in the deciliation in fibroblasts that can be induced by a combination of PDGF-AA and IGF-1 (Bielas et al., 2009). Interestingly, increased expression or activation of PDGFR $\alpha$  or PDGFR $\beta$  has been linked to cancer (Andrae et al., 2008). For example, the constitutively active PDGFR $\alpha$  D842V mutant accounts for approximately 5% of all gastrointestinal stromal tumors (GISTs), and drugs targeting PDGFR $\alpha$  and related RTKs are frequently used to treat GISTs (Corless et al., 2011; Kudo, 2011; Pietras et al., 2003). However, it is unclear whether the oncogenic potential of PDGFR $\alpha$  D842V is linked to ciliary defects. Here, we investigated the involvement of PDGFR $\alpha$ , PDGFR $\beta$  and PDGFR $\alpha$  D842V in deciliation in cultured cells.

**RESULTS AND DISCUSSION****PDGFR $\beta$  promotes deciliation in cultured cells**

To investigate the role of PDGFR $\alpha$  and PDGFR $\beta$  in deciliation, NIH3T3 cells were deprived of serum for 48 h to induce ciliogenesis and incubated for 10 h with specific ligands, and the percentage of ciliated cells was quantified with immunofluorescence microscopy using antibodies against ARL13B and acetylated tubulin. This analysis showed that the ligand PDGF-DD – specific for homodimeric PDGFR $\beta$  (Fredriksson et al., 2004) – potently promoted deciliation, whereas PDGF-AA – specific for homodimeric PDGFR $\alpha$  (Fredriksson et al., 2004) – as well as IGF-1 and EGF failed to induce significant deciliation under these conditions (Fig. 1A). PDGF-DD also caused significant deciliation in RPE1 cells

Department of Biology, Section of Cell and Developmental Biology, The August Krogh Building, University of Copenhagen, Universitetsparken 13, Copenhagen OE DK-2100, Denmark.

\*These authors contributed equally to this work

<sup>†</sup>Author for correspondence (LBPedersen@bio.ku.dk)

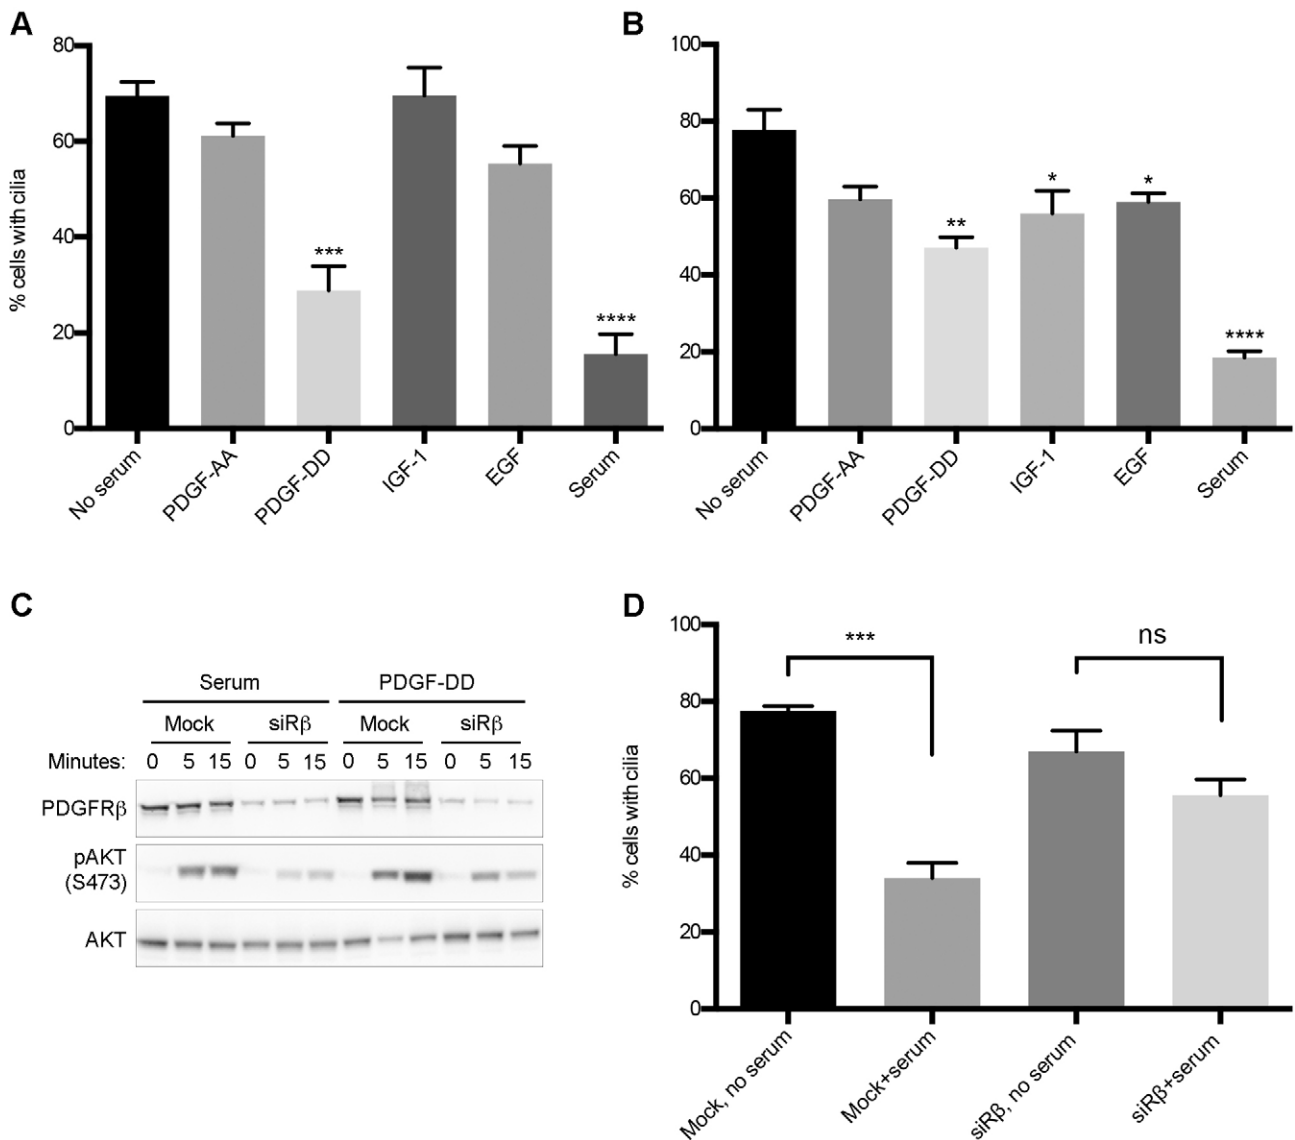

**Fig. 1. Involvement of PDGFR $\beta$  in ciliary disassembly.** (A) NIH3T3 cells or (B) RPE1 cells were serum-deprived (48 h) and incubated for 10 h with serum or 100 ng/ml of ligand, as indicated. Cilia were quantified by using immunofluorescence microscopy with antibodies against ARL13B and acetylated tubulin ( $n=3$ ;  $>50$  cells counted per condition). (C) Western blot of RPE1 cells that had been transfected with siRNA against PDGFR $\beta$  (siR $\beta$ ). At 24 h post transfection, cells were serum-deprived (48 h) and incubated with serum or PDGF-DD (100 ng/ml) for the indicated times. (D) Quantification of cilia (as described in A) in serum-deprived mock-transfected or PDGFR $\beta$ -depleted RPE1 cells before (no serum) or 10 h after serum re-addition. \*\*\*\* $P<0.0001$ , \*\*\* $P<0.001$ , \*\* $P<0.01$ , \* $P<0.05$  (see Materials and Methods for statistical tests). pAKT, phosphorylated AKT.

(Fig. 1B), but not as efficiently as in NIH3T3 cells (Fig. 1A) or in RPE1 cells that had been treated with serum (Fig. 1B), probably because additional growth factors, such as IGF-1, mediate deciliation in RPE1 cells (Yeh et al., 2013). Accordingly, modest deciliation was observed in RPE1 cells that were treated with IGF-1 or EGF (Fig. 1B). Thus, activation of PDGFR $\beta$ -PDGFR $\beta$  homodimers promotes deciliation in NIH3T3 cells and RPE1 cells, whereas activation of PDGFR $\alpha$ -PDGFR $\alpha$  homodimers does not. We cannot exclude that activation of PDGFR $\alpha$  or other RTKs causes deciliation under different experimental conditions – e.g. upon simultaneous activation of multiple receptors.

To substantiate the role of PDGFR $\beta$  in deciliation, we depleted the receptor from RPE1 cells with small interfering (si)RNA, which we confirmed by using a ligand stimulation assay and subsequent western blotting with antibodies against PDGFR $\beta$  and AKT phosphorylated at residue S473 (Fig. 1C), and investigated by

using immunofluorescence microscopy whether serum-deprived cells could deciliate following serum re-addition for 10 h. Depletion of PDGFR $\beta$  did not significantly affect the ability of cells to form cilia but markedly impaired serum-induced deciliation (Fig. 1D). We conclude that PDGFR $\beta$  is essential for serum-induced ciliary disassembly in RPE1 cells.

#### PLC $\gamma$ is required for deciliation in RPE1 cells

Next, we investigated the pathway involved in PDGFR $\beta$ -dependent serum-induced deciliation. PDGFR $\alpha$  and PDGFR $\beta$  signal through MEK1/2-ERK1/2, PI3K-AKT and PLC $\gamma$  (also known as PLCG1) pathways (Andrae et al., 2008), but PDGFR $\beta$  activates PLC $\gamma$  more potently than PDGFR $\alpha$  (Eriksson et al., 1995). Inhibitors against AKT1 and AKT2 (Akt1/2) or MEK1/2 (U0126) did not significantly affect serum-induced deciliation in RPE1 cells (supplementary material Fig. S1), whereas PLC $\gamma$  inhibitor

U73122 completely abolished serum-induced deciliation in these cells (Fig. 2A), similar to AURKA or CaM (W13) inhibition (Fig. 2A) (Plotnikova et al., 2012; Pugacheva et al., 2007). Thus, PLC $\gamma$  activity is important for serum-induced deciliation in RPE1 cells. Consistently, western blot analysis confirmed that serum, PDGF-DD or EGF caused phosphorylation of PLC $\gamma$  at residue Y783, whereas the effects of PDGF-AA and IGF-1 on PLC $\gamma$  Y783 phosphorylation were undetectable (Fig. 2B). PDGF-AA stimulation also failed to induce phosphorylation of S473 on AKT (Fig. 2B), probably because PDGFR $\alpha$  is expressed at low levels in RPE cells (Lei et al., 2011).

PLC $\gamma$  catalyzes formation of inositol 1,4,5-trisphosphate (IP $_3$ ) and diacylglycerol from phosphatidylinositol 4,5-bisphosphate, which respectively lead to activation of IP $_3$  receptors and release

of Ca $^{2+}$  from intracellular stores, as well as to activation of PKC (Berridge, 1993). Intracellular Ca $^{2+}$  release triggers deciliation in *Chlamydomonas* (Quarmby and Hartzell, 1994; Quarmby et al., 1992) and mammalian cells (Plotnikova et al., 2012; Tucker et al., 1979) by activating CaM and thereby AURKA (Plotnikova et al., 2012). We hypothesized that PDGFR $\beta$  promotes deciliation by activating PLC $\gamma$ -mediated intracellular Ca $^{2+}$  release, in turn leading to activation of CaM and AURKA-triggered deciliation. Indeed, PDGFR $\beta$ -depleted RPE1 cells, which fail to undergo serum-induced deciliation (Fig. 1D), that were treated with the Ca $^{2+}$  ionophore ionomycin deciliated to the same extent as mock-transfected control cells (Fig. 2C). Thus, forced release of Ca $^{2+}$  from intracellular stores rescued the deciliation phenotype of PDGFR $\beta$ -depleted RPE1 cells.

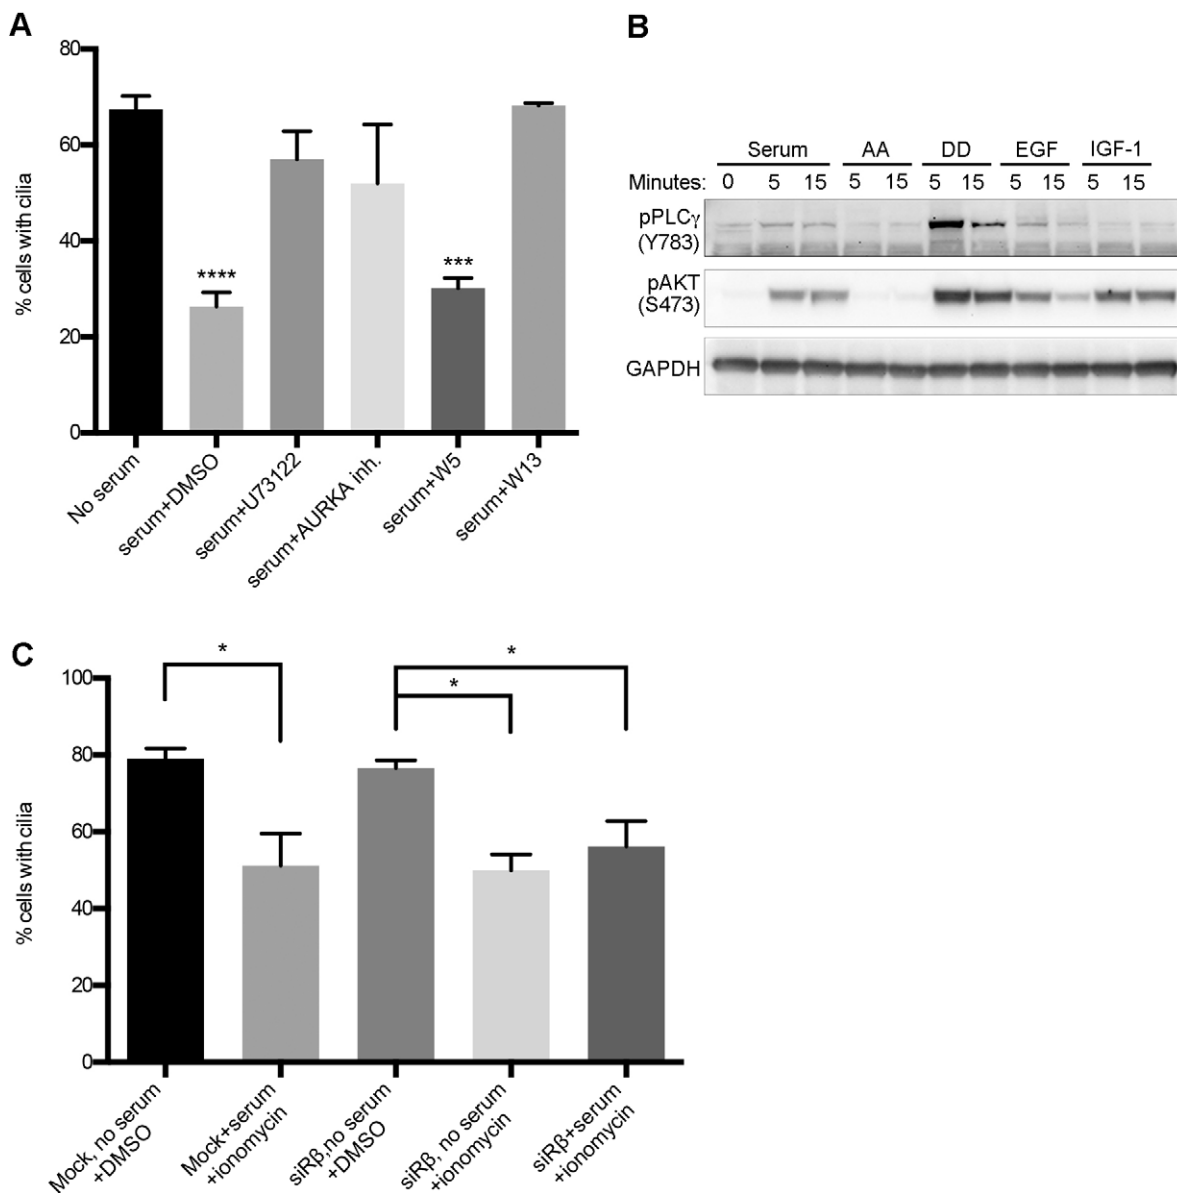

**Fig. 2. PDGFR $\beta$  promotes deciliation through a Ca $^{2+}$ -dependent mechanism.** (A) Serum-deprived (48 h) RPE1 cells were incubated in serum-containing medium for 8–10 h with inhibitors against PLC $\gamma$  (5  $\mu$ M U73122), AURKA (0.5  $\mu$ M AURKA inhibitor III, AURKA inh.) or calmodulin (50  $\mu$ M W13). W5 (50  $\mu$ M) is a negative control for W13. Cilia were quantified as described in Fig. 1A. (B) Western blot of serum-deprived (48 h) RPE1 cells that had been stimulated with serum or the indicated RTK ligands (100 ng/ml) for the indicated times. (C) Quantification of cilia in serum-deprived (48 h) mock-transfected or PDGFR $\beta$ -depleted RPE1 (siR $\beta$ ) cells incubated without or with serum plus DMSO or 1  $\mu$ M ionomycin for 4 h. \*\*\*\* $P$ ≤0.0001, \*\*\* $P$ ≤0.001, \*\* $P$ ≤0.01, \* $P$ ≤0.05 (see Materials and Methods for statistical tests). AA, PDGF-AA; DD, PDGF-DD; pAKT, phosphorylated AKT; pPLC $\gamma$ , phosphorylated PLC $\gamma$ .

### Expression of constitutively active PDGFR $\alpha$ D842V impairs ciliation in RPE1 cells

The oncogenic PDGFR $\alpha$  D842V mutant, which is constitutively active owing to conformational changes in the ATP-binding pocket (Corless et al., 2011; Olson and Soriano, 2009), potently activates PLC $\gamma$  compared to wild-type PDGFR $\alpha$  (Bahlawane et al., 2015; Olson and Soriano, 2009). To confirm the importance of PLC $\gamma$  signaling in deciliation, we investigated whether expression of PDGFR $\alpha$  wild-type (WT) and the mutant D842V affects ciliation in RPE1 cells. GFP-tagged versions of the receptors (WT-GFP and D842V-GFP) were expressed in cells, which were serum-deprived for 12 h with or without RTK inhibitors AG1296 (selective for PDGFR) and imatinib (selective for PDGFR, BCR-Abl and KIT), and cells were analyzed by western blotting with antibodies against GFP and PDGFR $\alpha$  phosphorylated at Y754 to assess fusion protein expression and functionality. Antibodies against phosphorylated Y754 have been used previously to demonstrate the autophosphorylation and activity of PDGFR $\alpha$  D842V (Heinrich et al., 2012; Moenning et al., 2009) and appear to be specific for PDGFR $\alpha$ -PDGFR $\beta$  heterodimers (Rupp et al., 1994). Blotting for GFP showed that WT-GFP migrated as three bands on the gel, corresponding to mature, partially glycosylated (high-mannose) and unglycosylated forms, whereas D842V-GFP was primarily in the high-mannose and unglycosylated forms (Fig. 3A), as reported

previously (Bahlawane et al., 2015). The blot of phosphorylated PDGFR $\alpha$  (at Y754) revealed that WT-GFP (mature and high-mannose forms) was moderately phosphorylated, presumably owing to receptor clustering, and this phosphorylation was completely inhibited by AG1296 or imatinib (Fig. 3A). By contrast, D842V-GFP (high-mannose form) was strongly phosphorylated and was fully (AG1296) or partially (imatinib) resistant to inhibition. These results are fully compatible with data published previously (Bahlawane et al., 2015; Corless et al., 2011; Heinrich et al., 2012) and confirm that heterologously expressed WT-GFP and D842V-GFP behave as expected. In addition to results obtained using the antibody against phosphorylated PDGFR $\alpha$  (at Y754) (Fig. 3A), which point to autophosphorylated PDGFR $\alpha$ -PDGFR $\beta$  heterodimers (Rupp et al., 1994), we obtained similar results with an antibody against phosphorylated PDGFR $\alpha$  (at Y720) (data not shown), recognizing autophosphorylated PDGFR $\alpha$ -PDGFR $\alpha$  (Schneider et al., 2005). This suggests that the heterologously expressed WT-GFP and D842V-GFP fusion proteins might engage in both homodimeric (exogenous PDGFR $\alpha$ -PDGFR $\alpha$ ) and heterodimeric (exogenous PDGFR $\alpha$  and endogenous PDGFR  $\beta$ ) complexes in the cells, although further work is required to confirm this.

Endogenous PDGFR $\alpha$  localizes to the primary cilium in mouse fibroblasts and ciliary PDGFR $\alpha$ -PDGFR $\alpha$  signaling activates

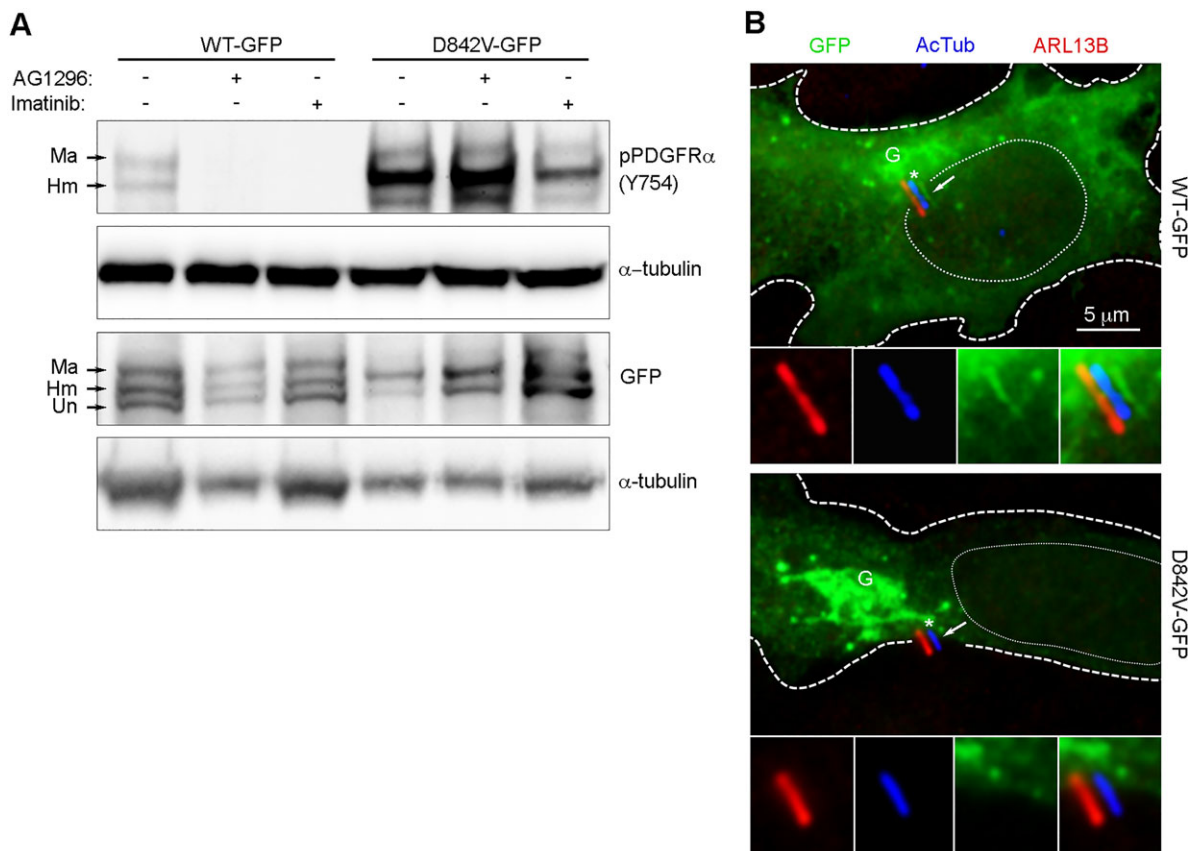

**Fig. 3. Expression of WT-GFP and D842V-GFP in RPE1 cells.** (A) Cells were transfected with plasmids encoding WT-GFP or D842V-GFP, incubated for 24 h in serum-containing medium followed by 12 h in medium without serum  $\pm$  10  $\mu$ M AG1296 or imatinib. Cells were analyzed by western blotting using antibodies against the indicated proteins. Bands corresponding to mature (Ma), partially glycosylated (high-mannose, Hm) and unglycosylated (Un) GFP-tagged receptor are marked (Bahlawane et al., 2015). (B) Immunofluorescence microscopy analysis of serum-starved (12 h) RPE1 cells expressing the indicated GFP fusions using antibodies against GFP (green), ARL13B (red) and acetylated tubulin (AcTub, blue). Green, blue and red images were merged and shifted to assess colocalization of GFP-tagged receptors and ciliary markers. Arrow, cilium; asterisks, ciliary base; G, Golgi. Smaller images show enlarged views of the primary cilium region of these images. Dashed lines outline the nucleus, bold dashed lines outline the cell periphery. pPDGFR $\alpha$ , PDGFR $\alpha$  phosphorylated at the indicated residue.

MEK1/2–ERK1/2 and AKT at the ciliary base to regulate directional cell migration (Clement et al., 2013; Schneider et al., 2010). Accordingly, immunofluorescence microscopy analysis of transfected RPE1 or NIH3T3 cells, which were serum-deprived for 12 or 24 h to promote ciliogenesis, showed that WT–GFP localized to the primary cilium and Golgi, marked by using antibodies against ARL13B or acetylated tubulin and IFT20 (Fig. 3B; supplementary material Fig. S2A). D842V–GFP localized to the Golgi in a similar manner, as reported previously (Bahlawane et al., 2015), but was not detected in cilia of the few ciliated cells observed (Fig. 3B). Indeed, most of the D842V–GFP-expressing cells examined lacked cilia (Fig. 4A), and this was not the result of over expression of the fusion protein because the average cellular expression level of D842V–GFP was approximately fourfold lower than that for WT–GFP, and their transfection efficiencies were similar (supplementary material Fig. S2B). Staining with an antibody against

retinoblastoma protein (Rb) that was phosphorylated at serine residues 807 and 811 confirmed that the serum-deprived D842V–GFP-expressing cells were in growth arrest, indicating that absence of cilia was not secondary to cell cycle defects (supplementary material Fig. S3). RTK inhibitors AG1296 or imatinib did not significantly affect ciliation in D842V–GFP-expressing cells (Fig. 4A), whereas crenolanib, a potent inhibitor of PDGFR $\alpha$  D842V kinase activity (Fig. 4C) (Heinrich et al., 2012), restored ciliation of D842V–GFP-expressing cells to that of controls (Fig. 4B). This suggests that D842V–GFP impairs ciliation in RPE1 cells through the kinase activity of the mutant receptor.

**AURKA inhibition restores ciliation in D842V–GFP-expressing cells**

Because PLC $\gamma$  is important for deciliation in RPE1 cells (Fig. 2A) and is potently activated by PDGFR $\alpha$  D842V (Bahlawane et al.,

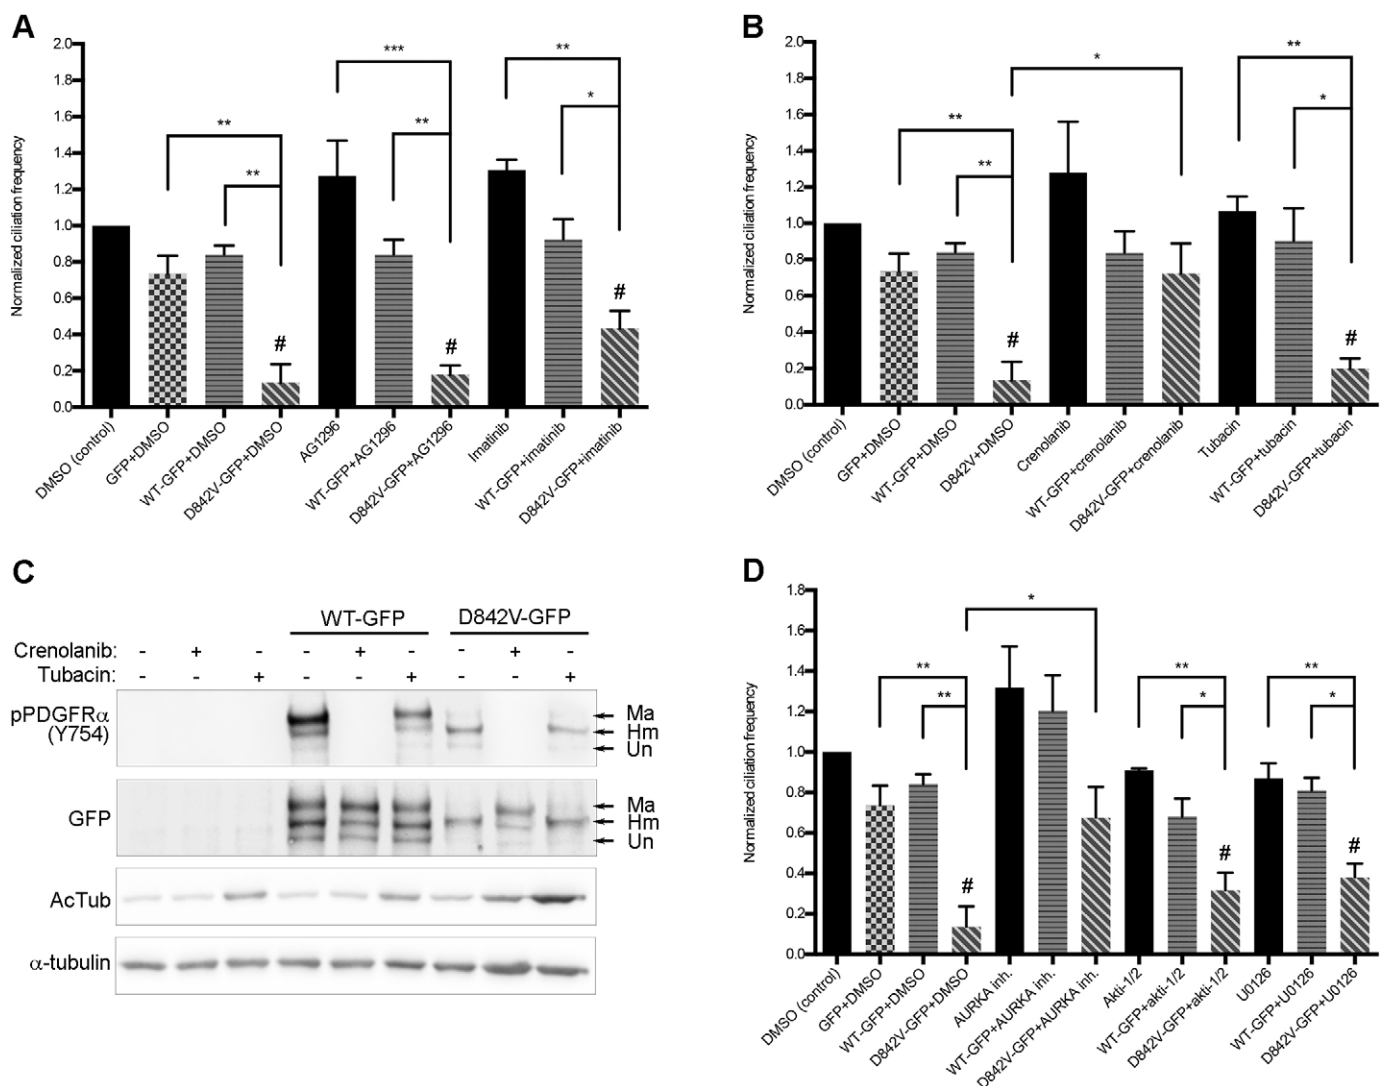

**Fig. 4. Expression of D842V–GFP leads to AURKA-dependent absence of cilia.** Untransfected RPE1 cells (black columns) or cells expressing GFP, WT–GFP or D842V–GFP were incubated for 12 h in serum-free medium supplemented with 10  $\mu$ M of the RTK inhibitors AG1296 or imatinib (A), or 1  $\mu$ M crenolanib or 2  $\mu$ M HDAC6 inhibitor (tubacin) (B) before being subjected to immunofluorescence microscopy analysis with antibodies against ARL13B and acetylated tubulin (AcTub). Cilia were quantified in blinded experiments ( $n=3$ ; >50 cells counted per condition), and the numbers were normalized to those of untransfected cells that had been treated with DMSO (control). (C) Western blot corresponding to the cells analyzed in B. (D) Cells were analyzed as described in A and B, but in the presence of 0.5  $\mu$ M AURKA inhibitor III (AURKA inh.), 3  $\mu$ M AKT inhibitor (Akt1-1/2) or 3  $\mu$ M MEK1/2 inhibitor (U0126). \*\*\*\* $P \leq 0.0001$ , \*\*\* $P \leq 0.001$ , \*\* $P \leq 0.01$ , \* $P \leq 0.05$  (see Materials and Methods for statistical tests). #Not significantly different from each other. pPDGFR $\alpha$ , PDGFR $\alpha$  phosphorylated at the indicated residue.

2015; Olson and Soriano, 2009), we asked whether PLC $\gamma$  inhibition affects ciliation in D842V–GFP-expressing RPE1 cells. Unfortunately, expression of D842V–GFP combined with incubation in serum-free medium containing PLC $\gamma$  inhibitor (U73122) caused cell death. However, western blot analysis confirmed that D842V–GFP activated PLC $\gamma$ , as judged by examining phosphorylation at residue Y783 (supplementary material Fig. S2C). Furthermore, inhibition of AKT and MEK1/2, two major kinases that are activated by PDGFR $\alpha$  (Andrae et al., 2008), did not significantly affect ciliation in D842V–GFP-expressing cells (Fig. 4D; supplementary material Fig. S2D). By contrast, inhibition of AURKA significantly restored the ciliation of D842V–GFP-expressing cells (Fig. 4D). We did not observe any effect of HDAC6 inhibition (tubacin) on the ciliation frequency of D842V–GFP-expressing cells (Fig. 4B,C), suggesting that D842V–GFP affects ciliation independently of HDAC6.

### Conclusions

Collectively, our results suggest that PDGFR $\beta$  and PDGFR $\alpha$  D842V promote deciliation by activating PLC $\gamma$ , which causes intracellular release of Ca<sup>2+</sup> and activation of CaM and AURKA (Plotnikova et al., 2012). Notably, chimeric mice lacking endogenous PDGFR $\beta$  display renal cysts and glomerulosclerosis (Klinghoffer et al., 2001), phenotypes associated with defective intracellular Ca<sup>2+</sup> signaling (Kuo et al., 2014) and ciliopathies (Hildebrandt et al., 2011). Because PDGFR $\alpha$  D842V and AURKA expression is linked to GIST (Corless et al., 2011; Yeh et al., 2014), and precursors of GIST cells are ciliated (Castiella et al., 2013), it will be interesting to study whether GIST cells display ciliary defects that are caused by elevated PLC $\gamma$  and AURKA activity.

### MATERIALS AND METHODS

#### Antibodies

For western blot, primary antibodies were (dilutions in parenthesis): rabbit anti-AKT (1:500) that recognizes all three AKT isoforms, rabbit anti-phosphorylated-AKT at S473 (1:500), rabbit anti-ERK1/2 (1:500), rabbit anti-phosphorylated-ERK1/2 at T202 and Y204 (1:500), rabbit anti-GAPDH (1:2000); rabbit anti-phosphorylated-PLC $\gamma$ 1 at Y783 (1:500) from Cell Signaling Technology; mouse anti- $\alpha$ -tubulin (1:5000) from Sigma-Aldrich; rabbit anti-PDGFR $\alpha$  (1:200) from Abcam; rabbit anti-GFP (1:500), rabbit anti-phosphorylated-PDGFR $\alpha$  at Y754 or -PDGFR $\alpha$  at Y720 (1:200), rabbit anti-PDGFR $\beta$  (1:200), rabbit anti-phosphorylated-PDGFR $\beta$  at Y857 (1:200) from Santa Cruz Biotech. Secondary antibodies for western blotting were horseradish-peroxidase-conjugated goat anti-mouse and swine anti-rabbit antibodies (1:4000) from Dako. For immunofluorescence microscopy analysis, primary antibodies were (dilutions in parenthesis): mouse anti-acetylated- $\alpha$ -tubulin (1:2000) from Sigma-Aldrich; rabbit anti-ARL13B (1:1000) from ProteinTech; chicken anti-GFP (1:2000) from Abcam; rabbit anti-phosphorylated-Rb at S807 and S811 (1:200) from Cell Signaling Technology. Rabbit polyclonal antibody against IFT20 (1:500) was from Dr Gregory Pazour (University of Massachusetts Medical School, Worcester, MA) (Follit et al., 2006). Secondary antibodies for immunofluorescence microscopy (all from Invitrogen and diluted 1:600) were AlexaFluor350-conjugated donkey anti-mouse or donkey anti-rabbit; AlexaFluor488-conjugated donkey anti-mouse and goat anti-chicken; AlexaFluor568-conjugated donkey anti-mouse and donkey anti-rabbit.

#### Ligands and inhibitors

Akti-1/2 and U0126 were from VWR; growth factors from R&D systems; ionomycin, PLC $\gamma$  inhibitor U73122 and AURKA inhibitor III (Cyclopropanecarboxylic acid {3-[4-(3-trifluoromethyl-phenylamino)-pyrimidin-2-ylamino]-phenyl}-amide) from Sigma; calmodulin inhibitor W13 and W5 from Calbiochem. Tubacin was from Dr Stuart Schreiber

(Broad Institute of Harvard & MIT, Cambridge, MA) (Haggarty et al., 2003). Stocks of ligands and inhibitors were prepared in DMSO.

#### Molecular biology procedures

Mouse *Pdgfra* was PCR-amplified from a cDNA clone (IMAGE ID 5704645) and cloned into pEGFP-N1 (Clontech) to create WT–GFP. D842V–GFP was generated from WT–GFP using mutated primers and standard cloning procedures. Plasmids were sequenced at Eurofins MWG Operon.

#### Cell culture and transfection

Cells were cultured as described previously (Schneider et al., 2005; Schröder et al., 2011). Transfection of RPE1 cells with plasmids was performed using FuGENE<sup>®</sup> 6 (Promega). For siRNA transfection, cells were seeded to 40% confluence and transfected with *PDGFRB*-specific (5'-AAUGAUGCCGAGGAACUAUUCAU-3') or mock siRNA (5'-UAAUGUAUUGGAAGCAUA-3') using DharmaFECT (Dharmacon).

#### SDS-PAGE and western blot analysis

SDS-PAGE and western blotting were performed as described previously (Christensen et al., 2001; Schröder et al., 2011), except that secondary antibodies were conjugated to horseradish peroxidase, and blots were developed with the FUSION-Fx chemiluminescence system (Vilber Lourmat). Images were processed in Adobe Photoshop CS6.

#### Immunofluorescence microscopy and statistical analyses

Procedures for immunofluorescence microscopy have been described previously (Schneider et al., 2005; Schröder et al., 2011). Statistical analysis was performed using GraphPad Prism 6 (GraphPad Software, San Diego, CA). Significance was calculated using data from three independent experiments and Student's *t*-test (when comparing two groups) or one-way ANOVA followed by Tukey's post-hoc test. Error bars denote s.e.m. *P*-values: \*\*\*\**P*≤0.0001, \*\*\**P*≤0.001, \*\**P*≤0.01, \**P*≤0.05.

#### Acknowledgements

We thank Søren L. Johansen for technical assistance and Gregory Pazour, Stuart Schreiber, Ivana Novak and Martin Berchtold for reagents.

#### Competing interests

The authors declare no competing or financial interests.

#### Author contributions

B.S.N. and R.R.M. performed most experiments and analyzed results. F.M.S. generated recombinant plasmids and provided data for Fig. 1A and supplementary material Fig. S2A. All authors conceived and planned experiments. B.S.N., L.B.P. and S.T.C. made figures. L.B.P. wrote the manuscript with input from all authors.

#### Funding

Supported by the Danish Cancer Society [grant number R56-A3151-12-S2]; *Velux Foundation*; and the University of Copenhagen Excellence Programme for Interdisciplinary Research. R.R.M. received a PhD fellowship from the Government of India and Department of Biology, University of Copenhagen.

#### Supplementary material

Supplementary material available online at <http://jcs.biologists.org/lookup/suppl/doi:10.1242/jcs.173559/-DC1>

#### References

- Andrae, J., Gallini, R. and Betsholtz, C. (2008). Role of platelet-derived growth factors in physiology and medicine. *Genes Dev.* **22**, 1276–1312.
- Bahlawane, C., Eulenfeld, R., Wiesinger, M. Y., Wang, J., Muller, A., Girod, A., Nazarov, P. V., Felsch, K., Vallar, L., Sauter, T. et al. (2015). Constitutive activation of oncogenic PDGFR $\alpha$ -mutant proteins occurring in GIST patients induces receptor mislocalisation and alters PDGFR $\alpha$  signalling characteristics. *Cell Commun. Signal.* **13**, 49.
- Berridge, M. J. (1993). Inositol trisphosphate and calcium signalling. *Nature* **361**, 315–325.
- Bielas, S. L., Silhavy, J. L., Brancati, F., Kisseleva, M. V., Al-Gazali, L., Sztrihai, L., Bayoumi, R. A., Zaki, M. S., Abdel-Aleem, A., Rosti, R. O. et al. (2009). Mutations in INPP5E, encoding inositol polyphosphate-5-phosphatase E, link phosphatidyl inositol signaling to the ciliopathies. *Nat. Genet.* **41**, 1032–1036.

- Castiella, T., Muñoz, G., Luesma, M. J., Santander, S., Soriano, M. and Junquera, C.** (2013). Primary cilia in gastric gastrointestinal stromal tumours (GISTs): an ultrastructural study. *J. Cell. Mol. Med.* **17**, 844-853.
- Christensen, S. T., Guerra, C., Wada, Y., Valentin, T., Angeletti, R. H., Satir, P. and Hamasaki, T.** (2001). A regulatory light chain of ciliary outer arm dynein in *Tetrahymena thermophila*. *J. Biol. Chem.* **276**, 20048-20054.
- Clement, D. L., Mally, S., Stock, C., Lethan, M., Satir, P., Schwab, A., Pedersen, S. F. and Christensen, S. T.** (2013). PDGFRalpha signaling in the primary cilium regulates NHE1-dependent fibroblast migration via coordinated differential activity of MEK1/2-ERK1/2-p90RSK and AKT signaling pathways. *J. Cell Sci.* **126**, 953-965.
- Corless, C. L., Barnett, C. M. and Heinrich, M. C.** (2011). Gastrointestinal stromal tumours: origin and molecular oncology. *Nat. Rev. Cancer* **11**, 865-878.
- Eriksson, A., Nånberg, E., Rönnstrand, L., Engström, U., Hellman, U., Rupp, E., Carpenter, G., Heldin, C.-H. and Claesson-Welsh, L.** (1995). Demonstration of functionally different interactions between phospholipase C-gamma and the two types of platelet-derived growth factor receptors. *J. Biol. Chem.* **270**, 7773-7781.
- Follit, J. A., Tuft, R. A., Fogarty, K. E. and Pazour, G. J.** (2006). The intraflagellar transport protein IFT20 is associated with the Golgi complex and is required for cilia assembly. *Mol. Biol. Cell* **17**, 3781-3792.
- Fredriksson, L., Li, H. and Eriksson, U.** (2004). The PDGF family: four gene products form five dimeric isoforms. *Cytokine Growth Factor Rev.* **15**, 197-204.
- Gong, F., Liu, H., Li, J., Xue, L. and Zhang, M.** (2014). Peroxiredoxin 1 is involved in disassembly of flagella and cilia. *Biochem. Biophys. Res. Commun.* **444**, 420-426.
- Goto, H., Inoko, A. and Inagaki, M.** (2013). Cell cycle progression by the repression of primary cilia formation in proliferating cells. *Cell. Mol. Life Sci.* **70**, 3893-3905.
- Haggarty, S. J., Koeller, K. M., Wong, J. C., Grozinger, C. M. and Schreiber, S. L.** (2003). Domain-selective small-molecule inhibitor of histone deacetylase 6 (HDAC6)-mediated tubulin deacetylation. *Proc. Natl. Acad. Sci. USA* **100**, 4389-4394.
- Heinrich, M. C., Griffith, D., McKinley, A., Patterson, J., Presnell, A., Ramachandran, A. and Debiec-Rychter, M.** (2012). Crenolanib inhibits the drug-resistant PDGFRA D842V mutation associated with imatinib-resistant gastrointestinal stromal tumors. *Clin. Cancer Res.* **18**, 4375-4384.
- Hildebrandt, F., Benzing, T. and Katsanis, N.** (2011). Ciliopathies. *New Engl. J. Med.* **364**, 1533-1543.
- Inoko, A., Matsuyama, M., Goto, H., Ohmuro-Matsuyama, Y., Hayashi, Y., Enomoto, M., Ibi, M., Urano, T., Yonemura, S., Kiyono, T. et al.** (2012). Trichoplein and Aurora A block aberrant primary cilia assembly in proliferating cells. *J. Cell Biol.* **197**, 391-405.
- Kinzel, D., Boldt, K., Davis, E. E., Burtscher, I., Trümbach, D., Diplas, B., Attié-Bitach, T., Wurst, W., Katsanis, N., Ueffing, M. et al.** (2010). Pitchfork regulates primary cilia disassembly and left-right asymmetry. *Dev. Cell* **19**, 66-77.
- Klinghoffer, R. A., Muetting-Nelsen, P. F., Faerman, A., Shani, M. and Soriano, P.** (2001). The two PDGF receptors maintain conserved signaling in vivo despite divergent embryological functions. *Mol. Cell* **7**, 343-354.
- Kobayashi, T. and Dynlacht, B. D.** (2011). Regulating the transition from centriole to basal body. *J. Cell Biol.* **193**, 435-444.
- Kudo, M.** (2011). Signaling pathway and molecular-targeted therapy for hepatocellular carcinoma. *Dig. Dis.* **29**, 289-302.
- Kuo, I. Y., DesRochers, T. M., Kimmerling, E. P., Nguyen, L., Ehrlich, B. E. and Kaplan, D. L.** (2014). Cyst formation following disruption of intracellular calcium signaling. *Proc. Natl. Acad. Sci. USA* **111**, 14283-14288.
- Lee, K. H., Johmura, Y., Yu, L.-R., Park, J.-E., Gao, Y., Bang, J. K., Zhou, M., Veenstra, T. D., Yeon Kim, B. and Lee, K. S.** (2012). Identification of a novel Wnt5a-CK1varepsilon-Dvl2-Pik1-mediated primary cilia disassembly pathway. *EMBO J.* **31**, 3104-3117.
- Lei, H., Rhéaume, M.-A., Velez, G., Mukai, S. and Kazlauskas, A.** (2011). Expression of PDGFRalpha is a determinant of the PVR potential of ARPE19 cells. *Invest. Ophthalmol. Vis. Sci.* **52**, 5016-5021.
- Moening, A., Jager, R., Egert, A., Kress, W., Wardelmann, E. and Schorle, H.** (2009). Sustained platelet-derived growth factor receptor alpha signaling in osteoblasts results in craniosynostosis by overactivating the phospholipase C-gamma pathway. *Mol. Cell. Biol.* **29**, 881-891.
- Olson, L. E. and Soriano, P.** (2009). Increased PDGFRalpha activation disrupts connective tissue development and drives systemic fibrosis. *Dev. Cell* **16**, 303-313.
- Pan, J., Wang, Q. and Snell, W. J.** (2004). An aurora kinase is essential for flagellar disassembly in *Chlamydomonas*. *Dev. Cell* **6**, 445-451.
- Pan, J., Seeger-Nukpezah, T. and Golemis, E. A.** (2013). The role of the cilium in normal and abnormal cell cycles: emphasis on renal cystic pathologies. *Cell. Mol. Life Sci.* **70**, 1849-1874.
- Pietras, K., Sjöblom, T., Rubin, K., Heldin, C.-H. and Östman, A.** (2003). PDGF receptors as cancer drug targets. *Cancer Cell* **3**, 439-443.
- Plotnikova, O. V., Nikonova, A. S., Loskutov, Y. V., Kozyulina, P. Y., Pugacheva, E. N. and Golemis, E. A.** (2012). Calmodulin activation of Aurora-A kinase (AURKA) is required during ciliary disassembly and in mitosis. *Mol. Biol. Cell* **23**, 2658-2670.
- Pugacheva, E. N., Jablonski, S. A., Hartman, T. R., Henske, E. P. and Golemis, E. A.** (2007). HEF1-dependent Aurora A activation induces disassembly of the primary cilium. *Cell* **129**, 1351-1363.
- Quarmany, L. M. and Hartzell, H. C.** (1994). Two distinct, calcium-mediated, signal transduction pathways can trigger deflagellation in *Chlamydomonas reinhardtii*. *J. Cell Biol.* **124**, 807-815.
- Quarmany, L. M. and Parker, J. D.** (2005). Cilia and the cell cycle? *J. Cell Biol.* **169**, 707-710.
- Quarmany, L. M., Yueh, Y. G., Cheshire, J. L., Keller, L. R., Snell, W. J. and Crain, R. C.** (1992). Inositol phospholipid metabolism may trigger flagellar excision in *Chlamydomonas reinhardtii*. *J. Cell Biol.* **116**, 737-744.
- Rupp, E., Siegbahn, A., Rönnstrand, L., Wernstedt, C., Claesson-Welsh, L. and Heldin, C.-H.** (1994). A unique autophosphorylation site in the platelet-derived growth factor alpha receptor from a heterodimeric receptor complex. *Eur. J. Biochem.* **225**, 29-41.
- Schneider, L., Clement, C. A., Teilmann, S. C., Pazour, G. J., Hoffmann, E. K., Satir, P. and Christensen, S. T.** (2005). PDGFRalpha signaling is regulated through the primary cilium in fibroblasts. *Curr. Biol.* **15**, 1861-1866.
- Schneider, L., Cammer, M., Lehman, J., Nielsen, S. K., Guerra, C. F., Veland, I. R., Stock, C., Hoffmann, E. K., Yoder, B. K., Schwab, A. et al.** (2010). Directional cell migration and chemotaxis in wound healing response to PDGF-AA are coordinated by the primary cilium in fibroblasts. *Cell Physiol. Biochem.* **25**, 279-292.
- Schrader, J. M., Larsen, J., Komarova, Y., Akhmanova, A., Thorsteinsson, R. I., Grigoriev, I., Manguso, R., Christensen, S. T., Pedersen, S. F., Geimer, S. et al.** (2011). EB1 and EB3 promote cilia biogenesis by several centrosome-related mechanisms. *J. Cell Sci.* **124**, 2539-2551.
- Seeger-Nukpezah, T., Little, J. L., Serzhanova, V. and Golemis, E. A.** (2013). Cilia and cilia-associated proteins in cancer. *Drug Discov. Today Dis. Mech.* **10**, e135-e142.
- Spalluto, C., Wilson, D. I. and Hearn, T.** (2013). Evidence for reciliation of RPE1 cells in late G1 phase, and ciliary localisation of cyclin B1. *FEBS Open Bio* **3**, 334-340.
- Tucker, R. W., Scher, C. D. and Stiles, C. D.** (1979). Centriole deciliation associated with the early response of 3T3 cells to growth factors but not to SV40. *Cell* **18**, 1065-1072.
- Yeh, C., Li, A., Chuang, J.-Z., Saito, M., Cáceres, A. and Sung, C.-H.** (2013). IGF-1 activates a cilium-localized noncanonical Gbetagamma signaling pathway that regulates cell-cycle progression. *Dev. Cell* **26**, 358-368.
- Yeh, C. N., Yen, C. C., Chen, Y. Y., Cheng, C. T., Huang, S. C., Chang, T. W., Yao, F. Y., Lin, Y. C., Wen, Y. S., Chiang, K. C. et al.** (2014). Identification of aurora kinase A as an unfavorable prognostic factor and potential treatment target for metastatic gastrointestinal stromal tumors. *Oncotarget* **5**, 4071-4086.
- Zhu, D., Shi, S., Wang, H. and Liao, K.** (2009). Growth arrest induces primary-cilium formation and sensitizes IGF-1-receptor signaling during differentiation induction of 3T3-L1 preadipocytes. *J. Cell Sci.* **122**, 2760-2768.



Special Issue on 3D Cell Biology

Call for papers

Submission deadline: January 16<sup>th</sup>, 2016

Journal of Cell Science
